# Supplementary material
Source: PubMed Central journal article supplement (PMC6844258)
Supplement: NIHMS1536980-supplement-Supplementary_Figure_1.pdf [file NIHMS1536980-supplement-Supplementary_Figure_1.pdf]

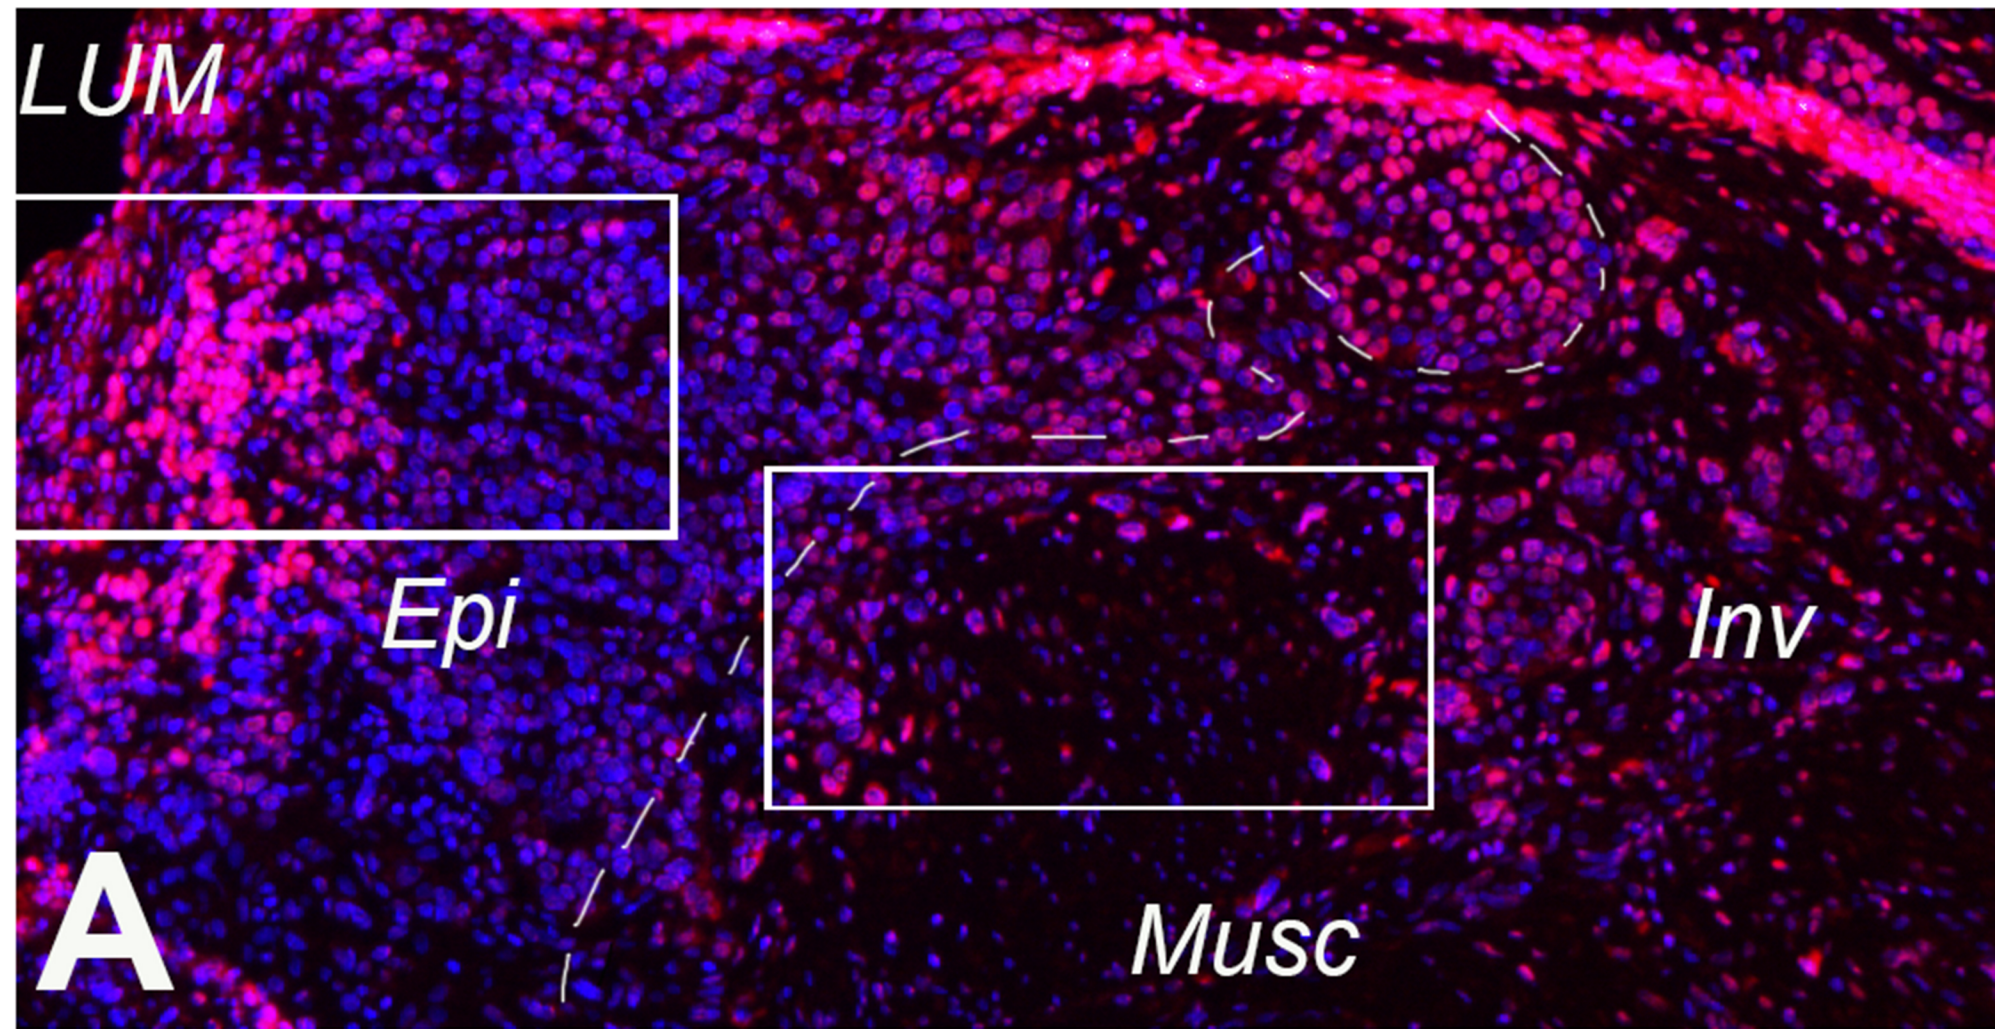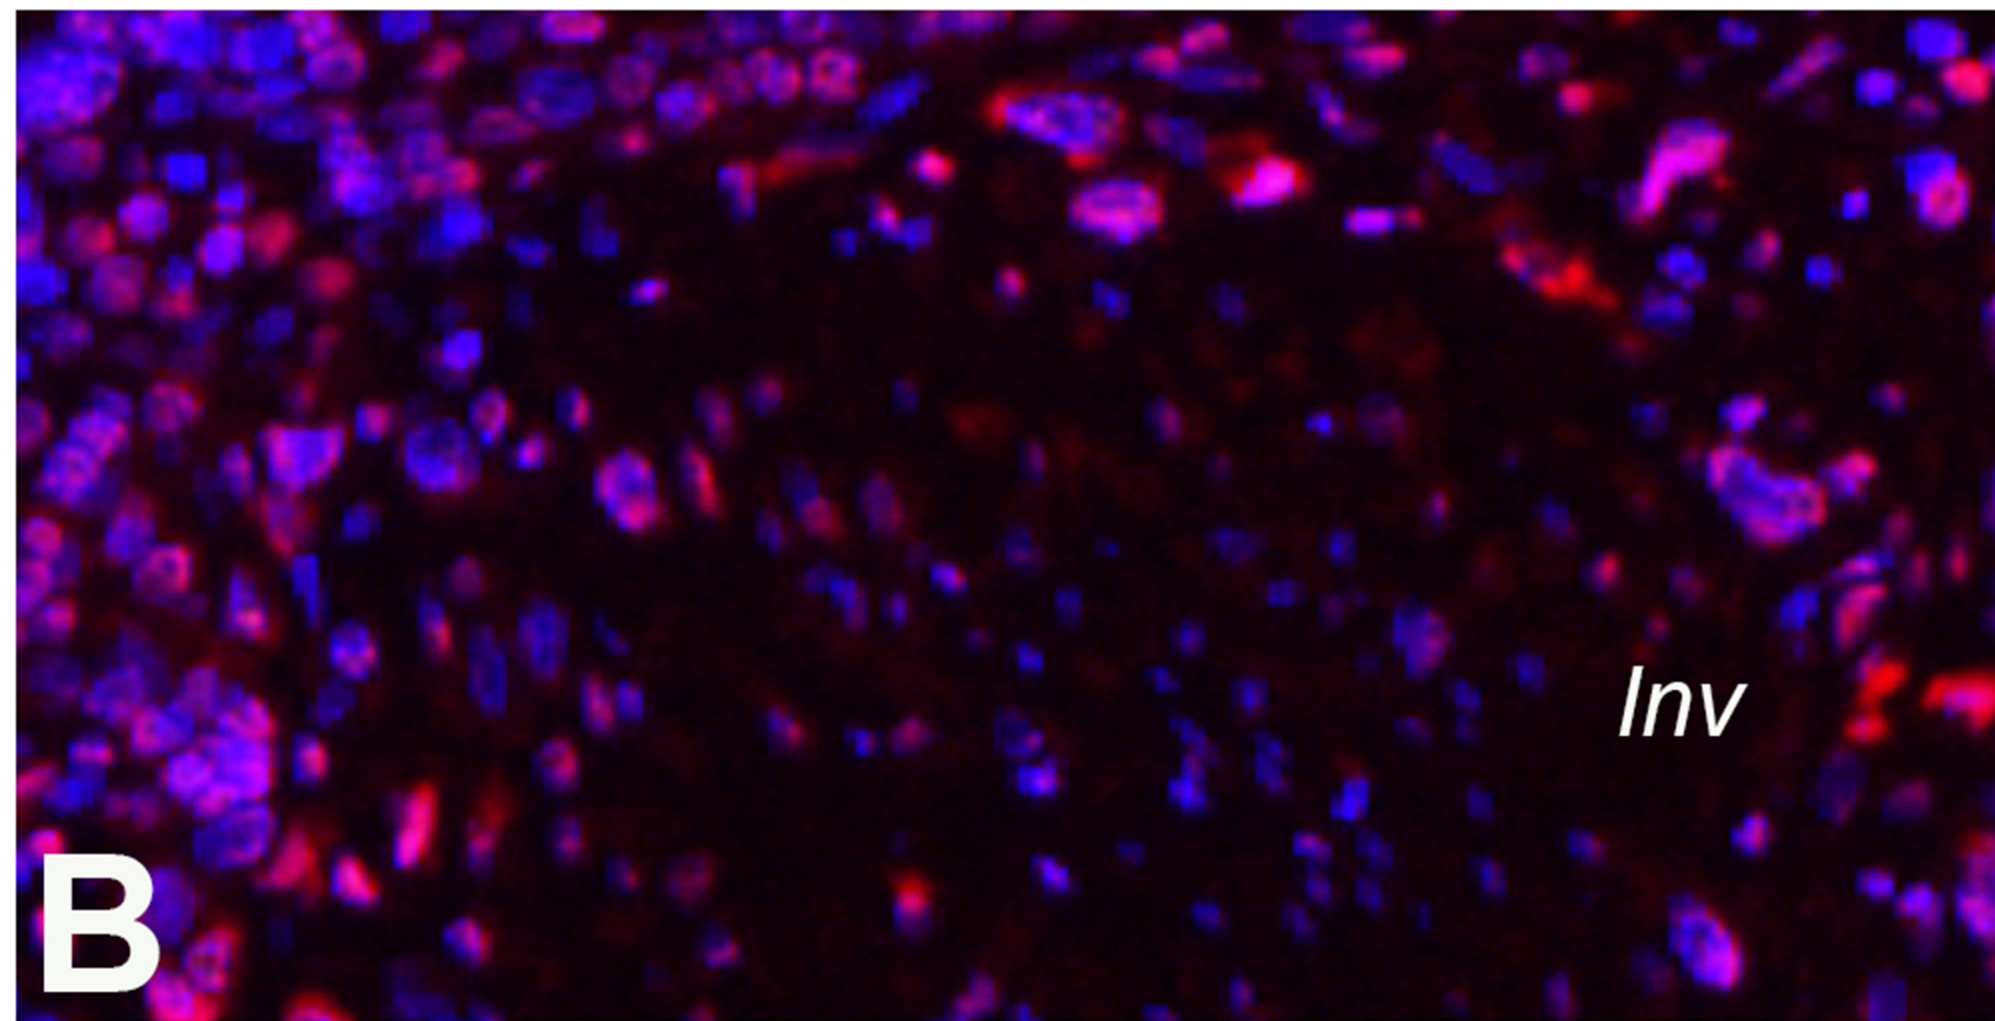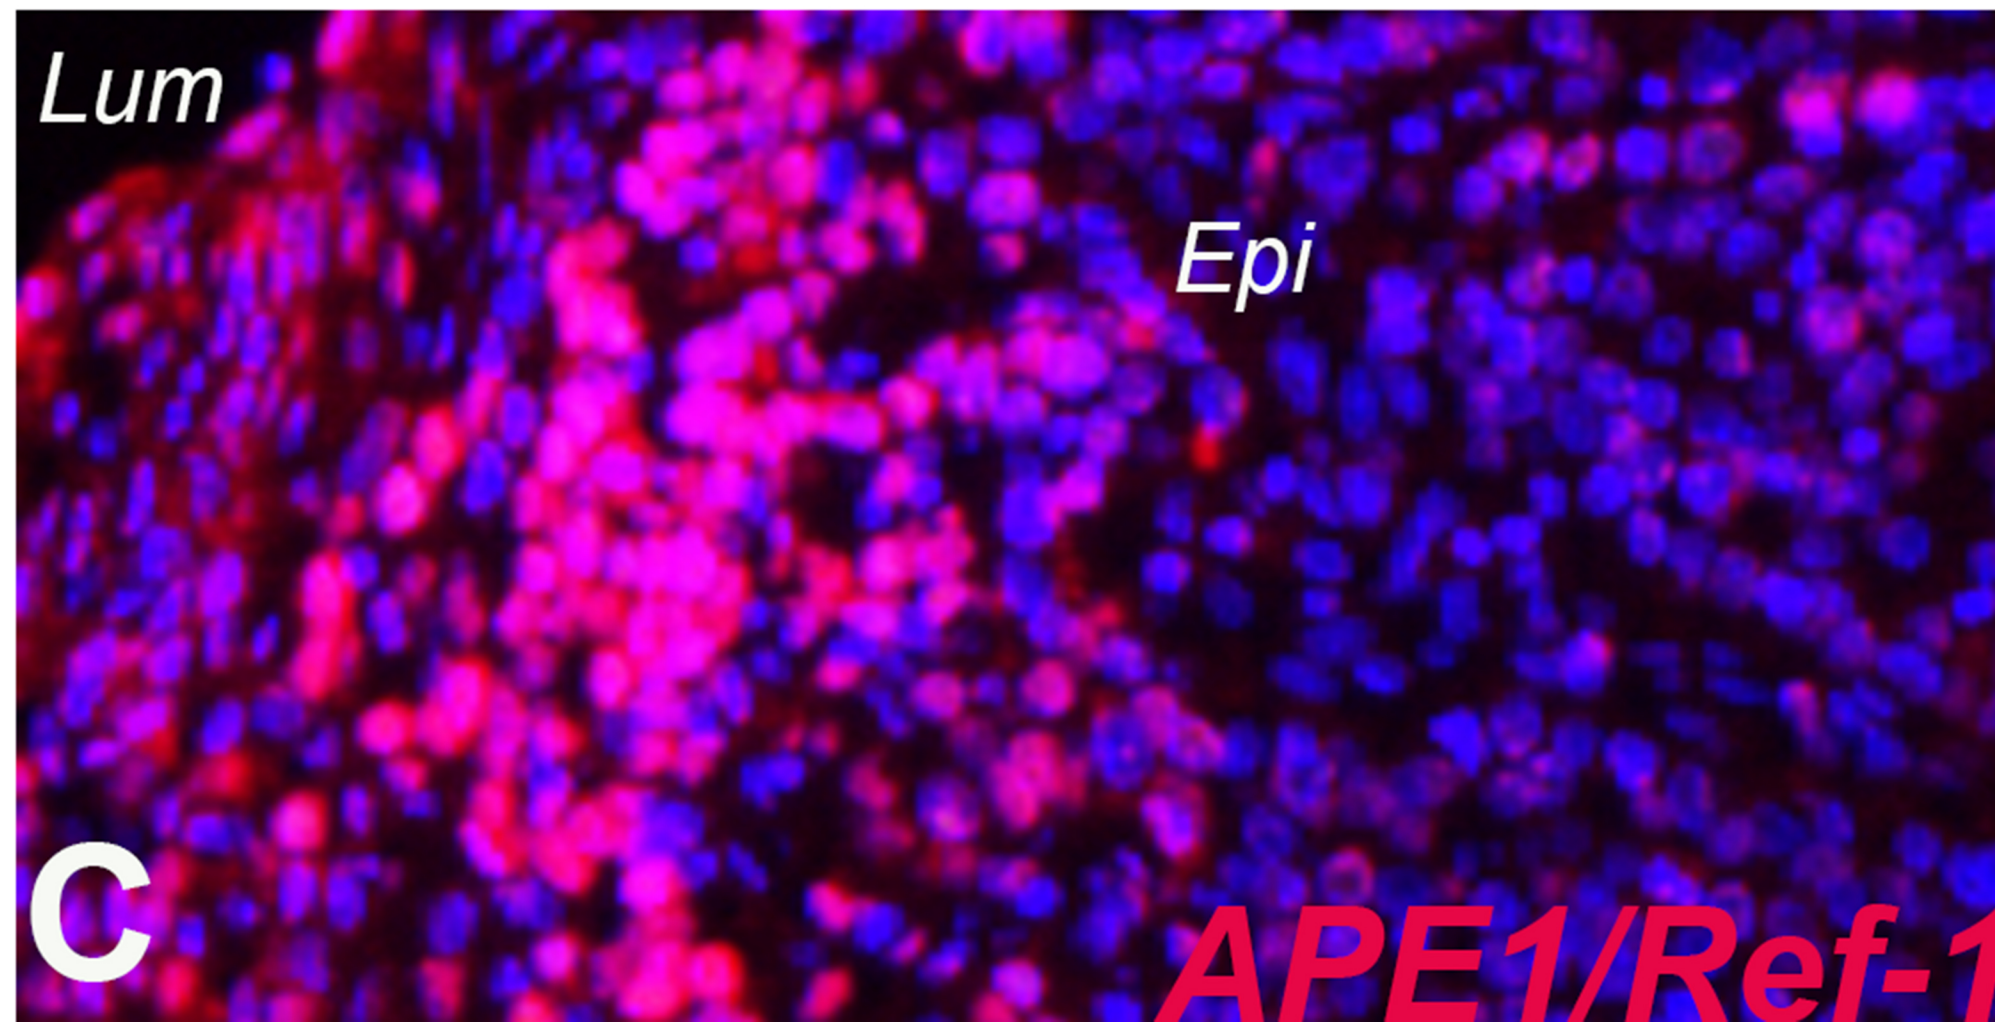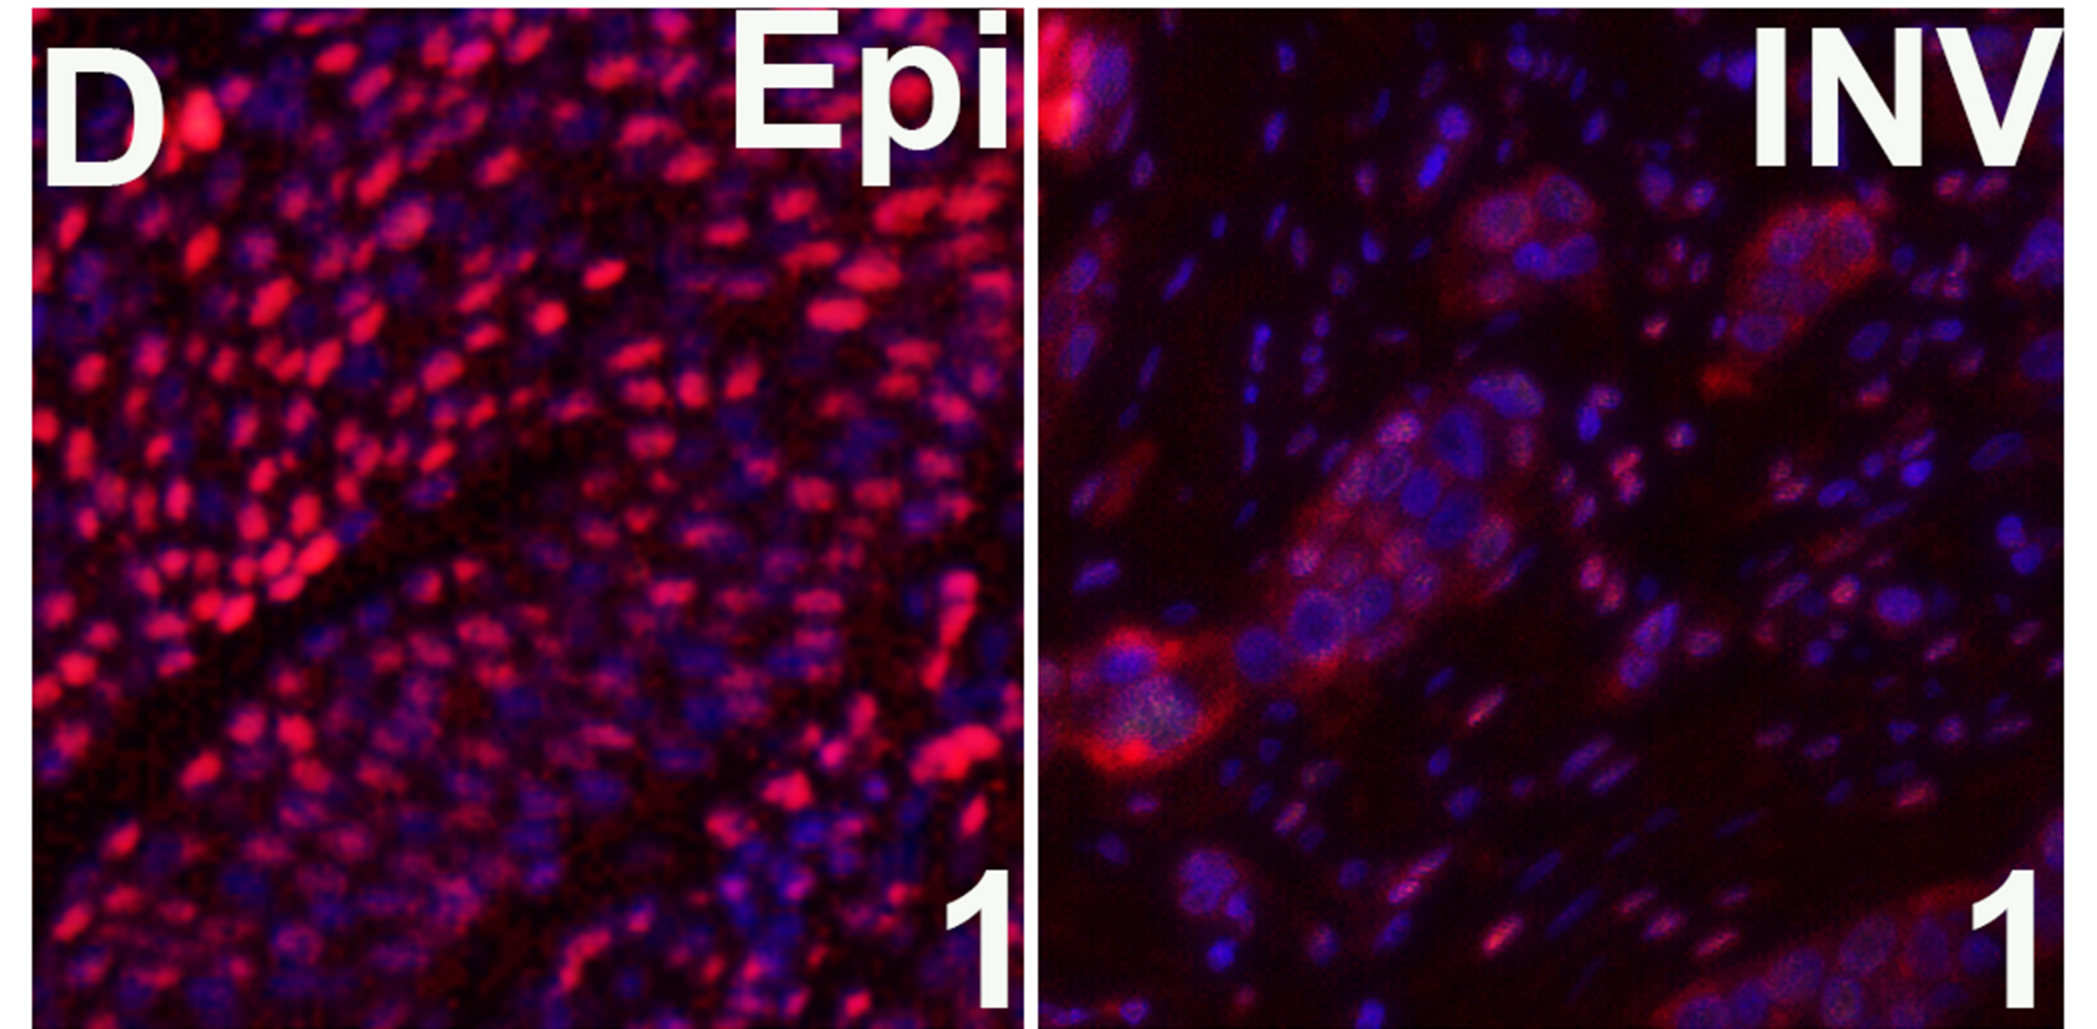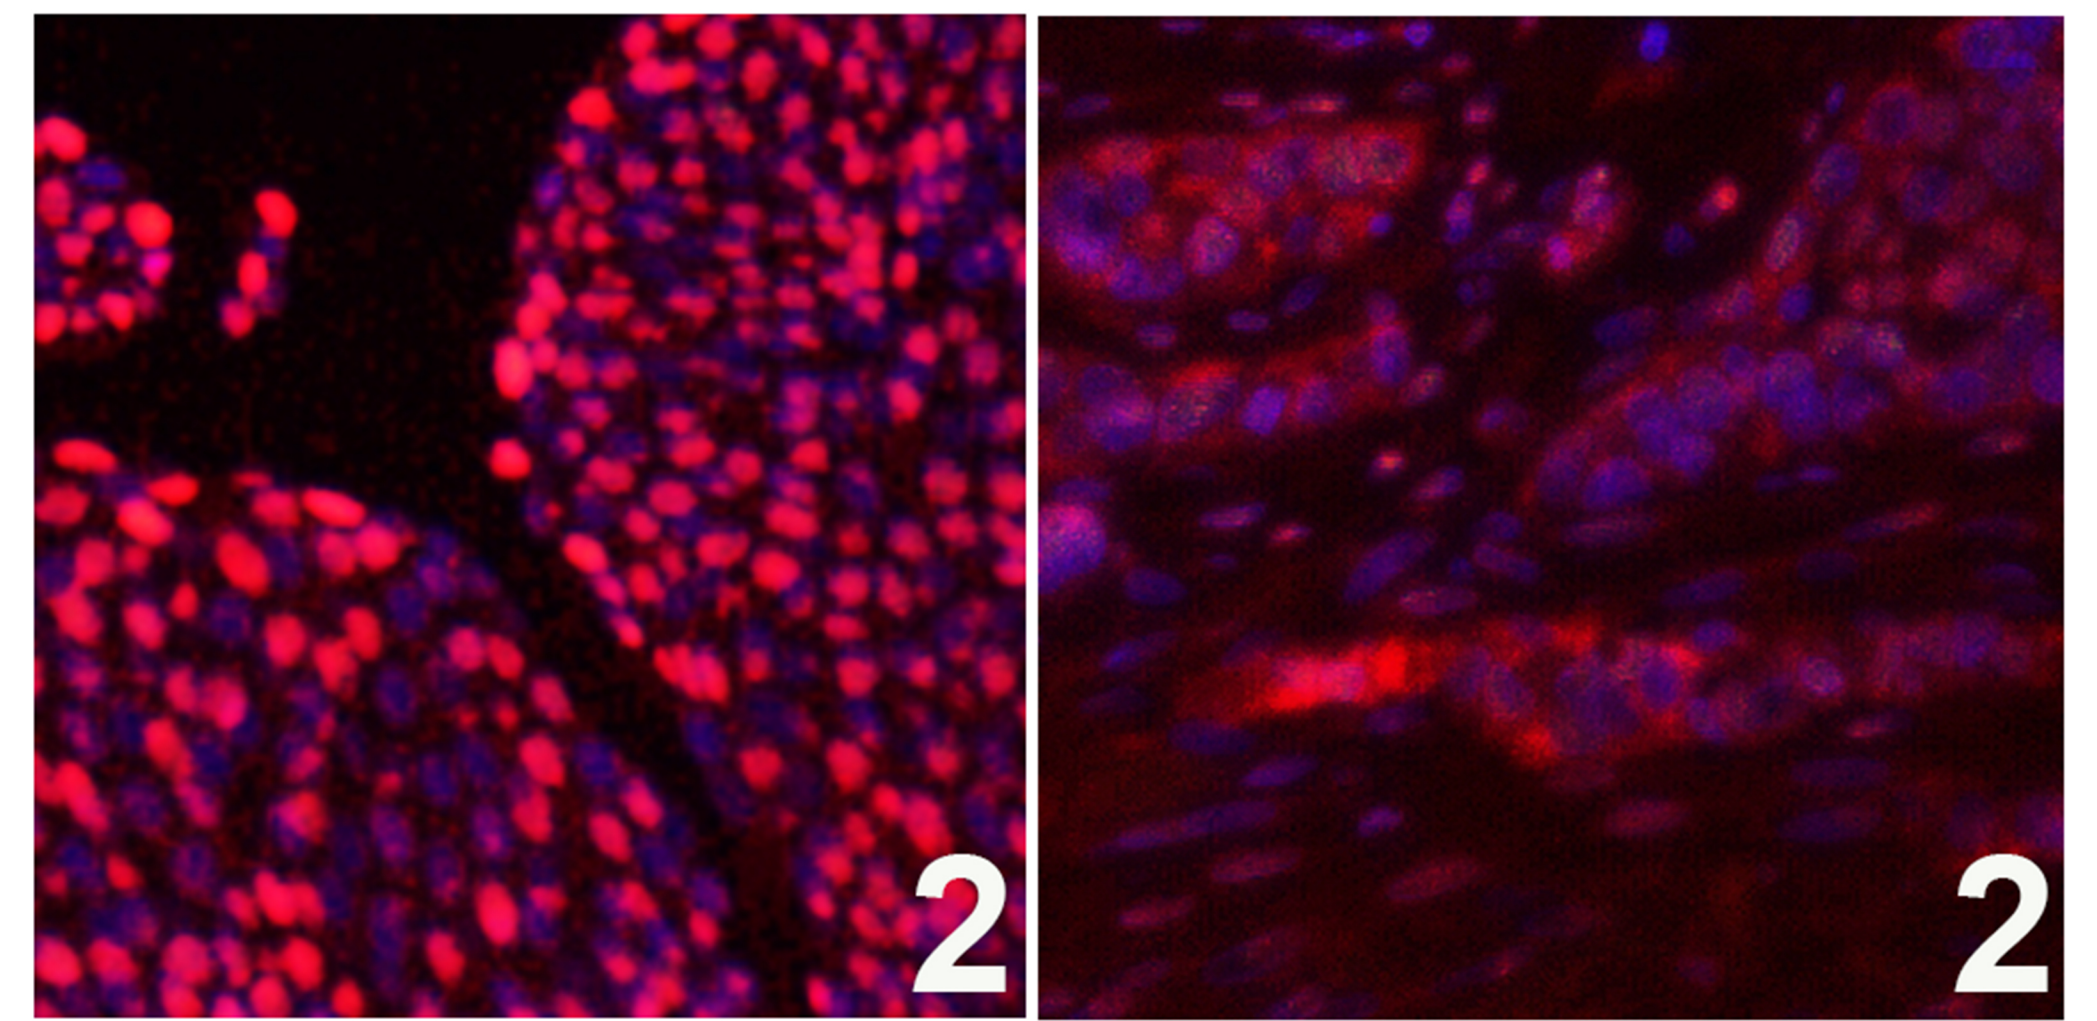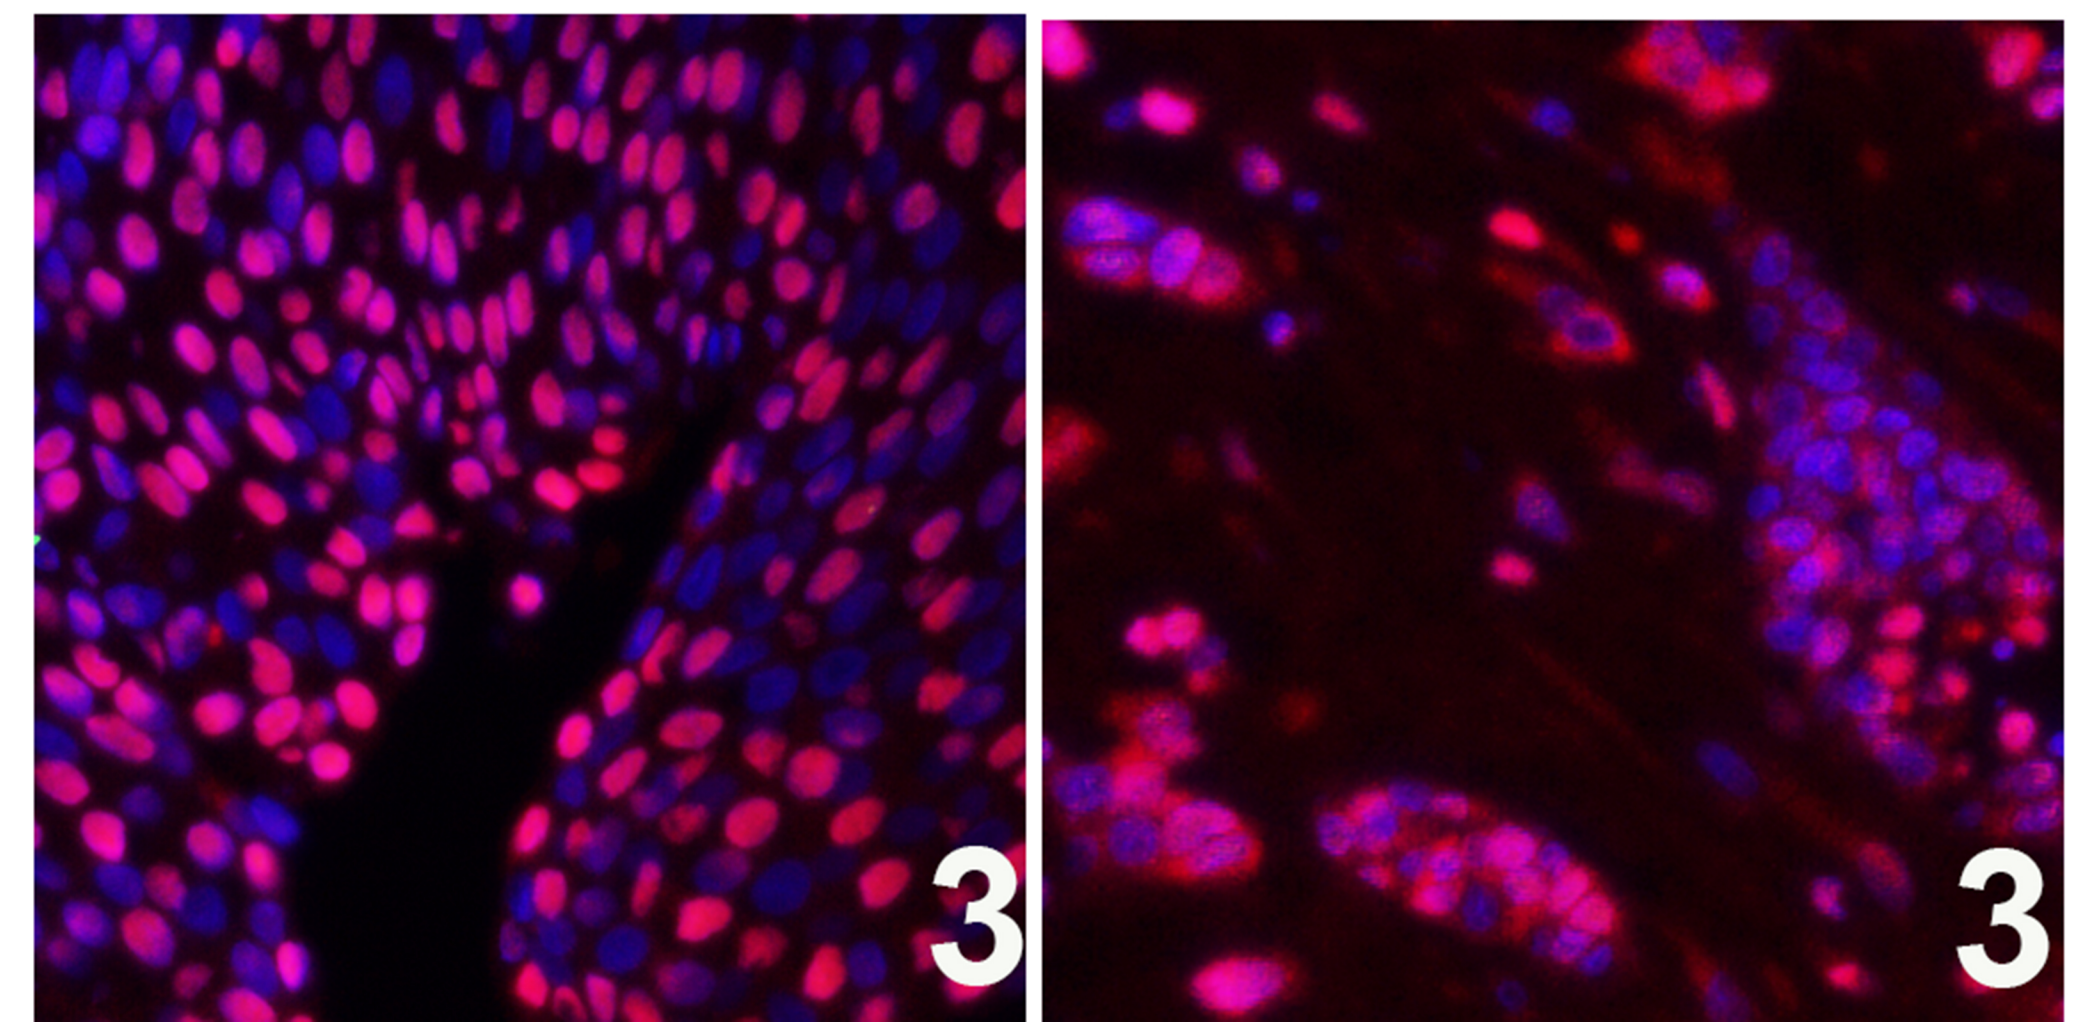

**Supplementary Figure 1. APE1/Ref-1 localization in human tumors.**

Additional examples of APE1/Ref-1 immunofluorescence in human bladder cancer specimens at 10X and 40X. Lower power (10X) [A] demonstrates transition from nuclear localized APE1/Ref-1 in the epithelial compartment (Epi) to cytosolic staining in the invasive regions of a human tumor, in the muscularis (Musc) in a single image, with high power (40x) views showing the cellular localization [B,C]. Additional examples in high power are shown in [D], from 3 different specimens (1-3), exclusively nuclear staining in the epithelial compartment (Epi) and cytosolic staining in the invasive satellite lesions (INV).
