# Supplementary material
Source: PubMed Central journal article supplement (PMC6844258)
Supplement: NIHMS1536980-supplement-Supplementary_Figure_4.pdf [file NIHMS1536980-supplement-Supplementary_Figure_4.pdf]

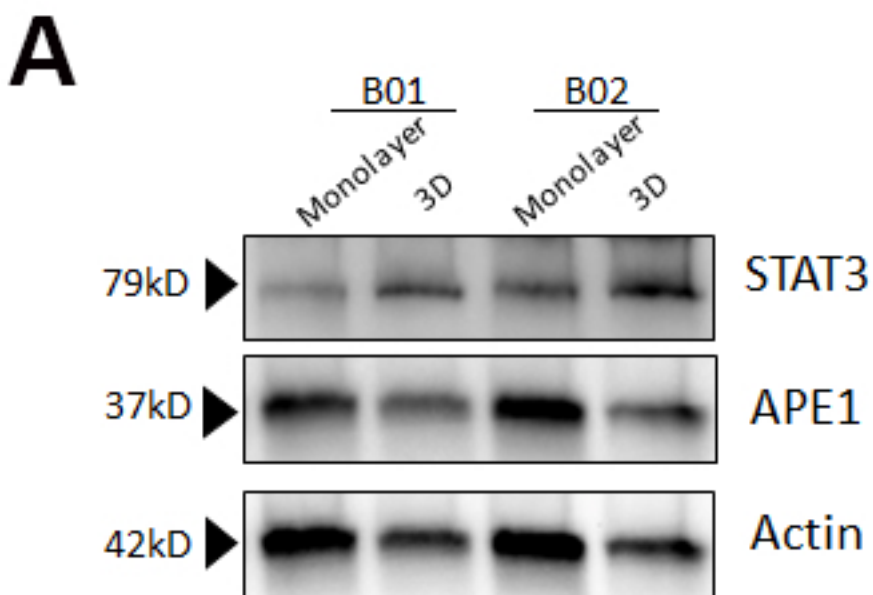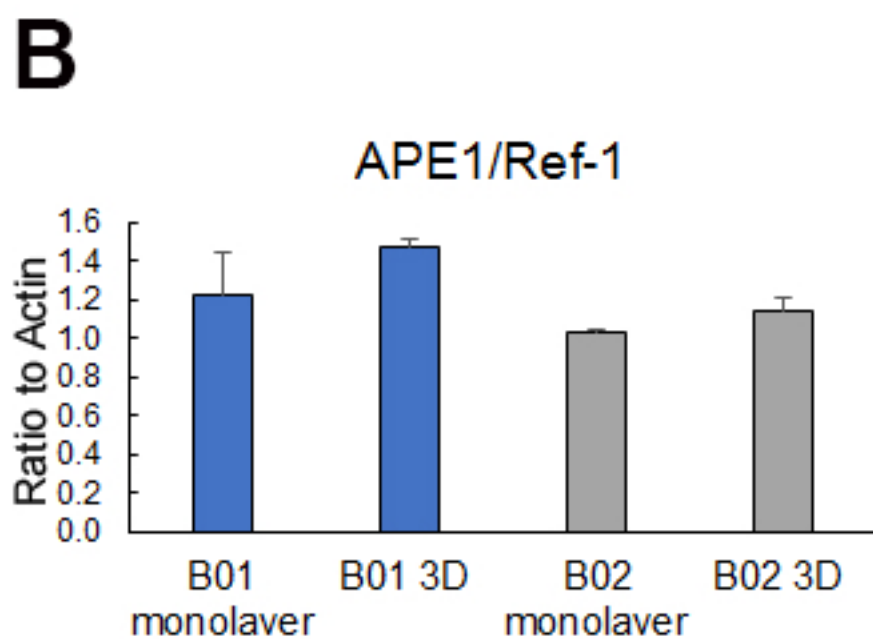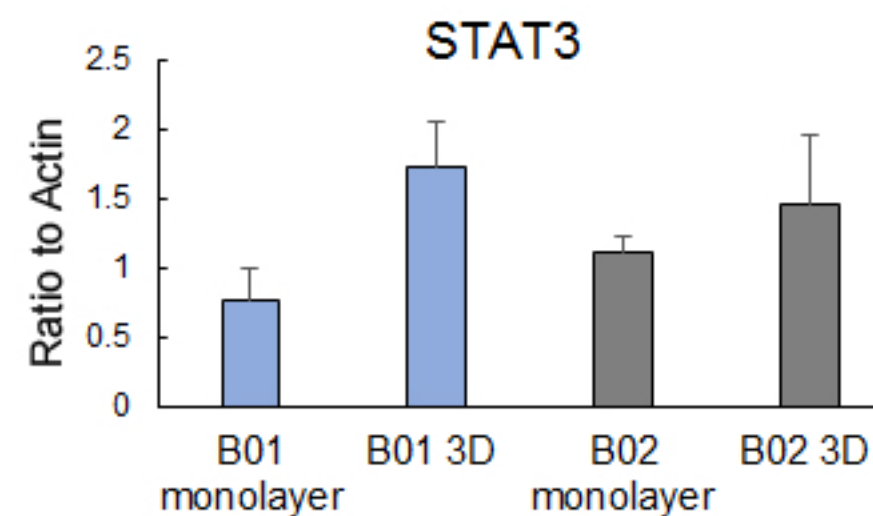

**Supplementary Figure 4. Confirmation of APE1/Ref-1 and STAT3 expression in 3d and monolayer conditions in RP-B-O1 and RP-B-O2 cells.** Basal growth conditions as described in the methods for each cell line were used for monolayer and 3D conditions. No significant differences in expression relative to actin were observed in either condition. Representative blot is shown in [A], and quantified data as the ratio of each protein to actin from 3 determinations is shown in [B,C].
