# Supplementary material
Source: PubMed Central journal article supplement (PMC6844258)
Supplement: NIHMS1536980-supplement-Supplementary_Video_Legend.pdf [file NIHMS1536980-supplement-Supplementary_Video_Legend.pdf]

Videos of caspase 3 activity used to capture images used in quantification of caspase activation, indicating apoptosis induction. Representative video of UC3 cells treated with DMSO control (Videos 1,2) red dye by itself (Video 1) or overlaid with brightfield image (Video 2). UC3 cells treated with APX2009 are shown with red dye by itself (Video 3) or overlaid with brightfield image (Video 4). Duration of the video is the 72 hour duration of the experiment, as quantified and shown in Figure 2. Representative stills are shown in supplementary figure 3.
